1 **Candidate genes-based investigation of susceptibility to Human African**  
2 **Trypanosomiasis in Côte d'Ivoire.**

3 Bernardin Ahouty<sup>1</sup>, Mathurin Koffi<sup>2\*</sup>, Hamidou Ilboudo<sup>3</sup>, Gustave Simo<sup>4</sup>, Enock Matovu<sup>5</sup>,  
4 Julius Mulindwa<sup>5</sup>, Christiane Hertz-Fowler<sup>6</sup>, Bruno Bucheton<sup>7</sup>, Issa Sidibé<sup>3</sup>, Vincent  
5 Jamonneau<sup>7-8</sup>, Annette MacLeod<sup>9</sup>, Harry Noyes<sup>6</sup>, Simon-Pierre N'Guetta<sup>1</sup>, for the  
6 TrypanoGEN Research Group as members of The H3Africa Consortium.

7 <sup>1</sup>Felix Houphouet Boigny University (UFHB), Cocody, Abidjan, Côte d'Ivoire; <sup>2</sup>Jean Lorougnon Guédé  
8 University (UJLoG), Daloa, Côte d'Ivoire;<sup>3</sup>Centre International de Recherche-Développement sur l'Élevage en  
9 zone Subhumide (CIRDES), Bobo-Dioulasso, Burkina Faso; <sup>4</sup>University of Dchang, Cameroon, <sup>5</sup>Makerere  
10 University, Kampala, Uganda,<sup>6</sup>Centre for Genomic Research, University of Liverpool, UK; <sup>7</sup>Institut de  
11 Recherche pour le Développement (IRD), IRD-CIRAD 177, Montpellier, France; <sup>8</sup>Institut Pierre Richet, Bouaké,  
12 Côte d'Ivoire, <sup>9</sup>Wellcome Center for Molecular Parasitology, University Place, Glasgow, UK.

13 *\*Corresponding Author*

14 Email: [bernadinahouty@yahoo.fr](mailto:bernadinahouty@yahoo.fr) (BA)

15 \*Email: [m9koffi@yahoo.fr](mailto:m9koffi@yahoo.fr) (MK)

16 Email: [hamidou\\_ilboudo@hotmail.com](mailto:hamidou_ilboudo@hotmail.com) (HI)

17 Email: [gsimoca@yahoo.fr](mailto:gsimoca@yahoo.fr) (GS)

18 Email: [matovue04@yahoo.com](mailto:matovue04@yahoo.com) (EM)

19 Email : [mujuls@gmail.com](mailto:mujuls@gmail.com) (JM)

20 Email : [c.Hertz-Fowler@liverpool.ac.uk](mailto:c.Hertz-Fowler@liverpool.ac.uk) (CH)

21 Email: [bruno.bucheton@ird.fr](mailto:bruno.bucheton@ird.fr) (BB)

22 Email: [isidibe@hotmail.com](mailto:isidibe@hotmail.com) (IS)

23 Email : [vincent.jamonneau@ird.fr](mailto:vincent.jamonneau@ird.fr) (VJ)

24 Email: [annette.macleod@glasgow.ac.uk](mailto:annette.macleod@glasgow.ac.uk) (AM)

25 Email: [harry@liverpool.ac.uk](mailto:harry@liverpool.ac.uk) (HN)

26 Email: [nguettaewatty@yahoo.fr](mailto:nguettaewatty@yahoo.fr) (SPN)

27 **Abstract**

28 Human African Trypanosomiasis (HAT) or sleeping sickness is a Neglected Tropical Disease.  
29 Long regarded as an invariably fatal disease, there is increasing evidence that infection by *T.*  
30 *b. gambiense* can result in a wide range of clinical outcomes, including latent infections,  
31 which are long lasting infections with no parasites detectable by microscopy. The  
32 determinants of this clinical diversity are not well understood but could be due in part to  
33 parasite or host genetic diversity in multiple genes, or their interactions. A candidate gene  
34 association study was conducted in Côte d'Ivoire using a case-control design which included  
35 a total of 233 subjects (100 active HAT cases, 100 controls and 33 latent infections). All three  
36 possible pairwise comparisons between the three phenotypes were tested using 96 SNPs in 16  
37 candidate genes (*IL1*, *IL4*, *IL4R*, *IL6*, *IL8*, *IL10*, *IL12*, *IL12R*, *TNFA*, *INFG*, *MIF*, *APOLI*,  
38 *HPR*, *CFH*, *HLA-A* and *HLA-G*). Data from 77 SNPs passed quality control. There were  
39 suggestive associations at three loci in *IL6* and *TNFA* in the comparison between active cases  
40 and controls, one SNP in each of *APOLI*, *MIF* and *IL6* in the comparison between latent  
41 infections and active cases and seven SNP in *IL4*, *HLA-G* and *TNFA* between latent infections  
42 and controls. No associations remained significant after Bonferroni correction, but the  
43 Benjamini Hochberg false discovery rate test indicated that there were strong probabilities  
44 that at least some of the associations were genuine.  
45 The excess of associations with latent infections despite the small number of samples  
46 available suggests that these subjects form a distinct genetic cluster different from active HAT  
47 cases and controls, although no clustering by phenotype was observed by principle  
48 component analysis. This underlines the complexity of the interactions existing between host  
49 genetic polymorphisms and parasite diversity.

50 **Keywords:** Single nucleotide polymorphism; Candidate genes; Association study; Human  
51 African trypanosomiasis; Sleeping sickness, Cote d'Ivoire

## 52 **Author summary**

53 Since it was first identified, human African trypanosomiasis (HAT) or sleeping sickness has  
54 been described as invariably fatal. Recent data however suggest that infection by *T. b.*  
55 *gambiense* can result in a wide range of clinical outcomes in its human host including long  
56 lasting infections, that can be detected by the presence of antibodies, but in which parasites  
57 cannot be seen by microscopy; these cases are known as latent infections. While the factors  
58 determining this varied response have not been clearly characterized, the effectors of the  
59 immune responses have been partially implicated as key players. We collected samples from  
60 people with active HAT, latent infections and controls in endemic foci in the Côte d’Ivoire.  
61 We tested the role of single nucleotide polymorphisms (SNPs) in 16 genes on  
62 susceptibility/resistance to HAT by means of a candidate gene association study. There was  
63 some evidence that variants of the genes for *IL4*, *IL6*, *APOLI*, *HLAG*, *MIF* and *TNFA*  
64 modified the risk of developing HAT. These proteins regulate the inflammatory response to  
65 many infections or are directly involved in killing the parasites. In this study, the results were  
66 statistically weak and would be inconclusive on their own, however other studies have also  
67 found associations in these genes, increasing the chance that the variants that we have  
68 identified play a genuine role in the response to trypanosome infection in Côte D’Ivoire.

## 69 **Introduction**

70 Sleeping sickness, or human African Trypanosomiasis (HAT), is caused by *Trypanosoma*  
71 *brucei gambiense* and *T.b. rhodesiense* and is transmitted by tsetse flies (*Glossina spp*). *T. b.*  
72 *gambiense* is associated with a more chronic disease that can take decades to become patent,  
73 and *T.b. rhodesiense* causes an acute disease within months of infection. The chronic form of  
74 the disease caused by the *T. b. gambiense* is classically characterized by an early  
75 hemolymphatic stage (stage 1) associated with non-specific symptoms such as intermittent  
76 fevers and headaches, followed by a meningo-encephalitic stage (stage 2) in which the

77 parasite invades the central nervous system and causes neurological disorders and death if left  
78 untreated. This chronic form is found in Western and Central Africa while the acute form  
79 caused by *T. b. rhodesiense* is endemic to Eastern Africa [1,2]. However, recent observations  
80 are increasingly indicating that infection by *T. b. gambiense* can result in a wide range of  
81 clinical outcomes in its human host [3,4]. Self-cure processes have been described and  
82 reviewed in Checchi *et al.* [3]. Furthermore, some authors argued that HAT is not invariably  
83 fatal [5], supporting observations made by Garcia *et al.* [4] who followed individuals who  
84 remained seropositive for HAT but without detectable parasites for two years. This clinical  
85 diversity is not well understood but could be due to parasite genetic diversity [6,7], human  
86 immune gene variability [8] or their interaction [9]. It has been suggested that genetic  
87 polymorphisms of the parasite could be associated with asymptomatic and very chronic  
88 infections [10]. Nevertheless, genes involved in the host immune response have been  
89 implicated in the control of infection or susceptibility to HAT [11,12] and also *T. congolense*  
90 infections in experimental models [13,14]. Among the genes implicated in the pathogenesis of  
91 the disease, are *IL1, IL4, IL6, IL8, IL10, IL12, IFNG, TNFA, CFH* and *MIF* [8,11,15-17].

92 Some studies have found associations between certain polymorphisms in genes encoding  
93 cytokines. For example, *IL4* plays a role in susceptibility to *T. brucei* infection [18], while  
94 polymorphisms in the *IL6* and *IL10* genes have been associated with a decreased risk of  
95 developing HAT [11,15]. On the other hand, polymorphisms in *TNFA* genes have been  
96 associated with an increased risk of developing the disease [11,15]. Furthermore, MacLean *et*  
97 *al.* [19] reported in their study that plasma levels of *IFNG* significantly decrease during the  
98 late stage of the *T.b. rhodesiense* disease [19]. Human blood contains trypanolytic factors  
99 (TLF1 and TLF2) that are lytic to almost all African trypanosomes except *T. b. rhodesiense*  
100 and *T. b. gambiense* [20]. Human TLF1 contains two primate-specific proteins,  
101 apolipoprotein L1 (APOL1) and haptoglobin-related protein (HPR). *APOL1* expression is

102 induced by *T. b. gambiense* infection but expression is not associated with susceptibility to  
103 sleeping sickness [21]. Macrophage migration inhibitory factor (MIF) contributes to  
104 inflammation-associated pathology in the chronic phase of *T. brucei* infection [16].

105 Although genes directly involved in the immune response, like genes encoding cytokines, are  
106 very important candidates, genes implicated in the regulation of immunity also have a critical  
107 role. Thus, Courtin et al. [12] have shown a genetic association between *HLA-G*  
108 polymorphisms and susceptibility to HAT.

109 There is now cumulative evidence that polymorphisms in genes involved in the control of the  
110 immune response and genes implicated in the regulation of immunity could play a role in  
111 HAT infection outcome [11,12].

112 We report a candidate gene association study of the role of single nucleotide polymorphisms  
113 (SNPs) in *IL1*, *IL4*, *IL4R*, *IL6*, *IL8*, *IL10*, *IL12*, *IL12R*, *TNFA*, *INFG*, *MIF*, *HPR*, *CFH*,  
114 *APOLI*, *HLA-A*, and *HLA-G* genes on susceptibility/resistance to HAT.

115

## 116 **Results**

### 117 **Characteristics of the population**

118 A total of 100 cases (or former cases), 100 controls and 33 latent infections were enrolled into  
119 the study (Table 1). The mean age (range) of the study population was 38.8 (6–84) years. The  
120 sex ratio (male: female) was 0.88 (109/124).

121

122

123

124 **Table1: Population characteristics**

125

126

|          | Cases<br>(n=100) | Controls<br>(n=100) | Latent infections<br>(n= 33) | Whole population<br>(n=233) | 127 |
|----------|------------------|---------------------|------------------------------|-----------------------------|-----|
| Age mean | 41,8             | 36,8                | 36                           | 38,8                        | 130 |
| Males    | 53               | 42                  | 14                           | 109                         | 131 |
| Females  | 47               | 58                  | 19                           | 124                         | 132 |
| TL+      | 65               | 0                   | 18                           | 83                          | 133 |
| TL-      | 35               | 100                 | 15                           | 150                         | 134 |
|          |                  |                     |                              |                             | 135 |
|          |                  |                     |                              |                             | 136 |
|          |                  |                     |                              |                             | 137 |

138 **Table 1:** Population characteristics. Cases: CATT+ve, microscopy +ve; Controls: CATT-ve  
139 and microscopy -ve. Trypanolysis negative (TL-ve) cases were from subjects who were  
140 retrospectively sampled for the purpose of this study and who had not been subject to the  
141 trypanolysis test when originally identified as HAT cases by CATT and microscopy. Latent  
142 infection: subjects who were CATT positive (CATTpl  $\geq 1/4$ ) but parasites could not be  
143 detected by microscopy at repeated tests for at least two years.

144

145 **Association study**

146 Three association analyses were run on the three possible pairwise combinations of the  
147 controls, latent infections and active HAT cases. After filtering out SNP loci that were not in  
148 Hardy Weinberg equilibrium ( $P < 0.001$ ), or had  $> 10\%$  missing genotypes or had minor allele  
149 frequencies of zero, 77 SNP loci remained in the latent infection vs active case comparison  
150 and 74 SNP loci remained in the other two comparisons. One individual was filtered out of  
151 the case sample and one out of the latent infection sample because of low genotyping rates  
152 ( $< 90\%$ ).

153  $F_{ST}$  between ethnic groups showed that allele frequency differences between the ethnic groups  
154 were small, indicating that ethnicity was unlikely to confound results (median  $F_{st}$  -

155 0.00011763,  $F_{st}$  maximum 0.015). Scatter plots of the first two principal components between  
156 the different phenotypes (cases, latent infections and controls) and different ethnic groups  
157 show that this population is homogeneous and that the samples did not cluster by phenotype  
158 or by ethnic groups (Fig 1) and consequently the data were not stratified by ethnicity.

159 **Fig 1.** Multidimensional scaling (ms) plots of the genotype data by ethnicity (upper plot) and  
160 phenotype (lower plot). The plots show no evidence of clustering either by ethnicity or  
161 phenotype.

162 There were suggestive associations at three loci in *IL6* and *TNFA* in the comparison between  
163 active cases and controls (Table 2), three loci in *APOLI*, *MIF* and *IL6* in the comparison  
164 between latent infections and active cases (Table 3) and five loci in *IL4* (Fig 2), and one each  
165 in *HLA-G* and *TNFA* between latent infections and controls (Table 4). After Bonferroni  
166 correction, none of these associations remained significant, however Bonferroni correction is  
167 very conservative, particularly since there was some linkage between adjacent marker SNP in  
168 some genes. The Benjamini-Hochberg false discovery rate (FDR) test, which shows the  
169 probability that an observation is a false positive, indicated that at least some of the  
170 suggestively positive samples may be true positives. Under the FDR the rs62449495 SNP in  
171 *IL6* had an 80% chance of being a true positive and the *TNFA*-308 rs1800629 SNP had a 71%  
172 chance of being a true positive (Table 2). The strongest association was with *APOLI*  
173 rs73885319, which is also known as the G1 allele, which had a 90% chance of being a true  
174 positive in the comparison between latent infections and controls (Table 3). Complete results  
175 for all tests that passed quality control are shown in supplementary data tables S1, S2 and S3.

176

177 **Fig 2.** Positions of SNP genotyped within *IL4*. SNP with suggestive associations (uncorrected  
178  $p < 0.05$ ) are indicated with a star.

179

180 **Table 2:** Association tests between cases (n=99) and controls (n=100)

| CHR     | BP         | SNP        | Gene | Cons | Min A | Cases | Controls | Maj A | P      | Bonf_Corr | FDR_BH | OR   | L95  | U95  | HWE_p |
|---------|------------|------------|------|------|-------|-------|----------|-------|--------|-----------|--------|------|------|------|-------|
| 7       | 22,764,338 | rs62449495 | IL6  | 5'   | A     | 0.04  | 0.13     | G     | 0.0025 | 0.20      | 0.20   | 0.30 | 0.13 | 0.68 | 1.00  |
| 6       | 31,543,031 | rs1800629  | TNFA | 5'   | A     | 0.09  | 0.19     | G     | 0.0071 | 0.58      | 0.29   | 0.44 | 0.24 | 0.80 | 0.51  |
| Missens |            |            |      |      |       |       |          |       |        |           |        |      |      |      |       |
| 7       | 22,767,137 | rs2069830  | IL6  | e    | T     | 0.11  | 0.06     | C     | 0.0369 | 1.00      | 0.81   | 2.17 | 1.02 | 4.61 | 1.00  |

181  
182 **Table 3:** Association tests between latent infections (n=32) and active HAT cases (n=99)

| CHR     | BP         | SNP        | Gene  | Cons | Min A | Cases | Latent | Maj A | P      | Bonf_Corr | FDR_BH | OR   | L95  | U95  | HWE_p |
|---------|------------|------------|-------|------|-------|-------|--------|-------|--------|-----------|--------|------|------|------|-------|
| Missens |            |            |       |      |       |       |        |       |        |           |        |      |      |      |       |
| 22      | 36,661,906 | rs73885319 | APOL1 | e    | G     | 0.20  | 0.41   | A     | 0.0012 | 0.10      | 0.10   | 0.37 | 0.20 | 0.68 | 1.00  |
| 22      | 24,235,455 | rs36086171 | MIF   | 5'   | G     | 0.29  | 0.13   | A     | 0.0062 | 0.52      | 0.26   | 2.90 | 1.30 | 6.46 | 0.05  |
| 7       | 22,764,338 | rs62449495 | IL6   | 5'   | A     | 0.04  | 0.13   | G     | 0.0217 | 1.00      | 0.61   | 0.29 | 0.10 | 0.80 | 1.00  |

183  
184 **Table 4:** Association tests between latent infections (n=32) and controls (n=100)

| CHR | BP          | SNP       | Gene  | Cons     | Min A | Latent | Controls | Maj A | P      | Bonf_Corr | FDR_BH | OR   | L95  | U95  | HWE_p |
|-----|-------------|-----------|-------|----------|-------|--------|----------|-------|--------|-----------|--------|------|------|------|-------|
| 5   | 132,009,154 | rs2243250 | IL4   | 5'       | C     | 0.42   | 0.27     | T     | 0.0159 | 1.00      | 0.48   | 2.02 | 1.13 | 3.64 | 0.80  |
| 5   | 132,010,726 | rs734244  | IL4   | Intronic | T     | 0.25   | 0.41     | C     | 0.0215 | 1.00      | 0.48   | 0.49 | 0.26 | 0.92 | 0.01  |
| 5   | 132,016,554 | rs2243282 | IL4   | Intronic | A     | 0.30   | 0.45     | C     | 0.0347 | 1.00      | 0.48   | 0.53 | 0.29 | 0.96 | 1.00  |
| 6   | 29,799,116  | rs1611139 | HLA-G | 3'       | T     | 0.26   | 0.14     | G     | 0.0354 | 1.00      | 0.48   | 2.13 | 1.04 | 4.36 | 0.39  |
| 5   | 132,009,710 | rs2070874 | IL4   | 5' UTR   | T     | 0.34   | 0.50     | C     | 0.0372 | 1.00      | 0.48   | 0.53 | 0.30 | 0.96 | 0.69  |
| 6   | 31,543,031  | rs1800629 | TNFA  | 5'       | A     | 0.08   | 0.19     | G     | 0.0396 | 1.00      | 0.48   | 0.37 | 0.14 | 0.99 | 0.51  |
| 5   | 132,014,109 | rs2243270 | IL4   | Intronic | A     | 0.36   | 0.23     | G     | 0.0415 | 1.00      | 0.48   | 1.88 | 1.02 | 3.45 | 1.00  |

185  
186 Cons= Consequence from Ensembl Variant predictor, Min A = minor allele, Maj A = major allele, Latent minor allele frequency of Latent cases;  
187 Controls minor allele frequency of controls; OR = odds ratio, P = p-value, [L95-U95] = confidence interval of odds ratio, Bonf\_Corr= Bonferroni  
188 corrected p value, FDR\_BH = False Discovery Rate Benjamini-Hochberg (it is probability of falsely rejecting the null hypothesis. The null  
189 hypothesis is that allele frequencies in cases and controls are the same), OR = odds ratio, [L95-U95] = confidence interval; HWE P is the Hardy-  
190 Weinberg p-value.



## 191 **DISCUSSION**

192 In this study, we investigated the role of single nucleotide polymorphisms on  
193 susceptibility/resistance to HAT. We genotyped 96 SNPs within sixteen genes that were  
194 investigated to test genetic association with HAT in Côte d'Ivoire. For consistency, all  
195 samples were commercially genotyped using two platforms: Genome Transcriptome de  
196 Bordeaux, France and LGC Genomics UK.

197 Our results suggest that three SNPs were associated with the development of HAT by  
198 controls, another three were associated with the development of active HAT by people with  
199 latent infections, and seven SNP were associated with the risk of developing latent infections  
200 five of them in *IL4* although none of these results remained significant after Bonferroni  
201 correction. Only two of the SNP with suggestive associations were coding and missense (*IL6*  
202 rs2069830 and *APOL1* rs73885319) since, with some exceptions, SNP were primarily selected  
203 as tags that might be linked to functional SNP rather than for any putative function.

204 The most striking feature of the results is that most associations were found in the  
205 comparisons with latent infections, despite limited power, with only 33 of these samples  
206 being available compared with 100 each for the cases and controls. This illustrates the  
207 increased power to be gained from using well defined phenotypes. Given the evidence that  
208 some people in West Africa can self-cure their *T. b. gambiense* infections [5] it is likely that  
209 some of the control subjects are resistant to infection or have recovered from infection, whilst  
210 others are naïve and susceptible. These two groups may have very different genetic  
211 backgrounds which could confound the association studies. The data also suggest that the  
212 latent infections may represent a genetically distinctive group. Although the principle  
213 component analysis did not identify any cluster associated with latent infections (Fig 1)  
214 further studies of their genetic and immunological profiles are required to test this hypothesis.

### 215 **Associations with *IL6***

216 The minor (A) allele of *IL6* rs62449495 appeared to protect against progression from latent  
217 infections to active HAT (Table 3) and against the development of active HAT by controls  
218 but these associations did not remain significant after Bonferroni correction (Table 2). The  
219 major allele of rs2069830 was also protective against the development of active HAT by  
220 controls before but not after Bonferroni correction (Table 2). The rs2069830 SNP causes a  
221 proline to serine change, but this is predicted to be benign by both Sift and Polyphen  
222 according to the Ensembl Variant Effect predictor. *IL6* plays a key role in the acute  
223 inflammatory response and in regulation of the production of acute phase proteins such as C-  
224 reactive protein [22]. It contributes to the inflammatory response, regulates haematopoiesis,  
225 which may contribute to the anaemia associated with HAT, and modifies the permeability of  
226 the blood brain barrier, which may contribute to the development of the stage 2 invasion of  
227 the CNS [22,23]. The results of our association study are consistent with the involvement of  
228 *IL6* variants in the susceptibility to the disease as Courtin *et al* [15] have reported before.  
229 However, it should be noted that the polymorphisms of *IL6* in our study (rs62449495 and  
230 rs2069830) are different of those found by Courtin *et al.* [15] with *IL6*<sub>4339</sub>= rs2069849. They  
231 showed that in DRC, *IL6*<sub>4339</sub> SNP was significantly associated with a decreased risk of  
232 developing the disease with a *P*-value = 0.0006 before the Bonferroni correction (0.04 after  
233 Bonferroni Correction).

#### 234 **Association with *TNFA***

235 Our results also indicate that subjects carrying the A allele of *TNFA* (rs1800629) A/G had a  
236 lower risk of developing active HAT (Table 2) or a latent infection (Table 4), suggesting the  
237 possibility of a protective effect. This SNP is also known as the *TNF*-308 SNP and the minor  
238 A allele is associated with higher plasma levels of *TNFA* [24]. In a previous study in Côte  
239 d'Ivoire, Courtin *et al.* [11] showed that the distribution of the *TNFA*-308G/A polymorphism  
240 did not differ significantly between cases and controls in the total population, but found that,

241 under a recessive model the AA genotype was associated with risk of HAT in the 39 cases  
242 and 57 controls who had been living in the endemic area of Sinfra for less than 10 years  
243 (before Bonferroni correction). In contrast, in our study, all participants had lived in the  
244 endemic area all their lives and the association was additive rather than recessive, furthermore  
245 the MAF in Courtin's studies was 24%, whilst in ours it was 14%, suggesting significant  
246 differences in population structure between the two studies. Varying results in *TNFA*  
247 associations studies are not uncommon, multiple candidate gene association studies of *TNFA*-  
248 308 (rs1800629) and malaria have found inconsistent results in different populations [25,26].  
249 Another explanation could be that the *TNFA*-308 has no effect but is in linkage disequilibrium  
250 (LD) with another unidentified polymorphism. Varying LD across populations might lead to  
251 different findings [27]. Despite the conflicting results from association study, animal models  
252 indicate that *TNFA* is likely to be a key mediator in the control of *T. brucei* infections [28]  
253 and a direct dose dependent lytic effect of *TNFA* on purified *T.b. gambiense* parasites has  
254 been reported suggesting an involvement in parasite growth control [29,30]. Given the  
255 experimental evidence for a role for *TNFA*, it is possible that inconsistent results of  
256 association studies are a consequence of different *TNFA* alleles only making a small  
257 difference to infection outcome and that therefore larger studies would be needed to detect  
258 associations and also to heterogeneity in regulation of *TNFA* between populations.

259

#### 260 **Association with *IL4***

261 Five of the seven SNP that were suggestively associated with the comparison between latent  
262 infections and controls were in *IL4* (Table 4, Fig 2). Three of these SNP were adjacent to each  
263 other at the 5' end of the gene (Fig 2), although linkage between them was modest ( $r^2 < 0.5$ ).  
264 While the individual associations did not remain significant after Bonferroni correction the  
265 observation that five of the sixteen SNP tested in *IL4* had suggestive associations increases

266 the probability of a genuine association with *IL4* and the risk of developing a latent infection.  
267 A study using three *IL4* SNP in DRC did not find any associations, but that was in a  
268 comparison between cases and controls [15]. In B10.Q mice deletion in *IL4* lead to increased  
269 *T. brucei* parasitaemia levels but longer survival time [18]. The relationship between *IL4*  
270 polymorphisms and acute HAT infection requires further study.

### 271 **Association with *APOLI***

272 The suggestive association with *APOLI* G1 allele rs73885319 and protection against  
273 progression from latent infection to active HAT is consistent with the association found in  
274 Guinea [31,32], although in those studies this SNP was also associated with increased risk of  
275 controls developing a latent infection as well. Moreover, *APOLI* expression is induced by *T.*  
276 *b. gambiense* infection but not associated with differential susceptibility to sleeping sickness  
277 [21]. *APOLI* rs73885319 is also known as the G1 allele of *APOLI* and is associated with  
278 kidney disease in African Americans and the relatively high frequency of this deleterious  
279 allele was assumed to be due to selection by HAT [33]. The data presented here is consistent  
280 with that hypothesis, but no support was found for the role of the G2 allele of *APOLI*  
281 (rs71785313) in HAT although it is implicated in kidney disease.

### 282 **Association with *MIF***

283 Although, our data show that subjects carrying the G allele of *MIF* (rs36086171) G/A had a  
284 risk of developing active HAT (table 3), we did not find a significant difference after  
285 correction (BONF = 0.52). Macrophage inhibitory factor (*MIF*) is a ubiquitously expressed  
286 protein that has proinflammatory, hormonal and enzymatic activities [34]. It is implicated in  
287 many inflammatory diseases [35]. It functions by recruiting myeloid cells to the site of  
288 inflammation [36], by inducing their differentiation towards M1 cells secreting TNF [37] and  
289 by suppressing p53-dependent apoptosis of inflammatory cells. While there are no human

290 studies directly linking *MIF* to HAT, murine studies show that *MIF* plays a role as a mediator  
291 of the inflammation which is a key feature in trypanosomiasis-associated pathology [16,38].

292

### 293 **Association with *HLA-G***

294 *HLA-G* molecule plays an important role on immune response regulation and has been  
295 associated with the risk of human immunodeficiency virus (HIV) infection [39], human  
296 papilloma virus [40] and herpes simplex virus type 1 [41]. The results of our association study  
297 are consistent with the involvement of *HLA-G* genetic variants in the susceptibility to the  
298 disease [12]. The rs1611139 T allele of the *HLA-G* gene showed a suggestive association with  
299 increased risk of controls a latent infection. This result could be due to differences in selection  
300 pressures possibly driven by variability in the immuno-pathology of the diseases. It is known  
301 that cytokines such as IL-10 can induce *HLA-G* expression by affecting mRNA transcripts  
302 and protein synthesis by human monocytes and trophoblasts, thus having a significant impact  
303 on parasitic infections [42].

### 304 **Conclusion**

305 The results discussed in this paper should be used with caution as no loci remained  
306 significantly associated with HAT after the Bonferroni correction for multiple testing,  
307 although some had high probabilities of being associated using a false discovery rate test.  
308 Some of the SNP loci identified here were also significant in other studies. Multiple  
309 independent observations of marginally significant effects suggest that these effects may be  
310 genuine but that the effect size is not large enough to be detected by the numbers available to  
311 be tested.

312 Our data support the findings from Guinea about the role of the *APOL1* G1 allele and also  
313 suggest that the polymorphisms of *IL4*, *IL6*, *HLA-G* and *TNFA* present interesting candidates  
314 for the investigation of the genetic susceptibility / resistance to HAT.

315 The large number of suggestive associations with latent infections despite the small number  
316 of samples indicate the people with latent infections form a genetically distinctive group that  
317 merit further investigation.

318

## 319 **Material and Methods**

### 320 **Population study, definition of phenotypes and study design**

321 The study took place in western-central Côte d'Ivoire in the main HAT foci of Bonon,  
322 Bouafle, Zoukougbeu, Oume, and Sinfra. Samples were collected in three stages, (i)  
323 previously archived samples; existing collections of previously archived samples were  
324 centralized to CIRDES (Centre International de Recherche-Développement sur l'Élevage en  
325 zone Subhumide) Burkina-Faso. (ii) retrospectively collected samples; study sites were  
326 revisited to consent and resample previously diagnosed and treated patients and (iii)  
327 prospectively collected samples including new HAT patients. Three phenotypes were  
328 considered: (i) cases, defined as individuals in whom the presence of trypanosomes was  
329 confirmed by microscopy; (ii) controls, defined as individuals living in the endemic area who  
330 are card agglutination test for trypanosomiasis (CATT) negative and trypanolysis test (TL)  
331 negative, and without evidence of previous HAT infection and (iii) latent infections, defined  
332 as subjects who were CATT positive ( $CATT_{pl} \geq 1/4$ ) but in whom parasites could not be  
333 detected by microscopy at repeated tests for at least two years.

334 A total of 233 individuals with 100 former HAT cases, 100 controls and 33 latent infections  
335 were included in the study. Samples were frozen directly in the field at  $-20^{\circ}\text{C}$  and kept at that  
336 temperature until use. For each individual, an aliquot of plasma was used to perform the  
337 immune trypanolysis test that detects Litat 1.3 and Litat 1.5 variable surface antigens specific  
338 for *T.b. gambiense* [43]. All control individuals ( $n=100$ ) included in this study were negative  
339 on the trypanolysis test (TL-ve) (Table 1).

340 This study was one of five studies of populations of HAT endemic areas in Cameroon, Côte  
341 d'Ivoire, Guinea, Malawi and Uganda by the TrypanoGEN consortium [44]. The studies were  
342 designed to have 80% power to detect odds ratios (OR) >2 for loci with disease allele  
343 frequencies of 0.15 – 0.65 and 100 cases and 100 controls with the 96 SNPs genotyped.  
344 Power calculations were undertaken using the genetics analysis package gap in R [45].

### 345 **Selection of SNPs and genotyping**

346 Genomic DNA was obtained from peripheral blood samples. Extraction was performed using  
347 the Qiagen DNA extraction kit (QIAamp DNA Blood Midi Kit) according to the  
348 manufacturer's instructions and quantified by Nanodrop assay. DNA was stored at -20 °C  
349 until analysis.

350 Ninety-six SNPs were genotyped in *IL1*, *IL4*, *IL4R*, *IL6*, *IL8*, *IL10*, *IL12*, *IL12R*, *TNFA*,  
351 *INFG*, *MIF*, *HPR*, *CFH*, *APOL1*, *HLA-A*, and *HLA-G*. The SNPs were selected by two  
352 strategies: 1) SNP in *IL4*, *IL6*, *IL8*, *HLA-G* and *IFNG* were designed as markers for linkage  
353 disequilibrium (LD) scans of each gene [46], 2) SNPs in other genes were selected based on  
354 reports in the literature that they were associated with trypanosomiasis or other infectious  
355 diseases. The LD scans were designed using 1000 Genomes Project data [47] ,merged with  
356 low fold coverage (8-10x) whole genome shotgun data generated from 230 residents living in  
357 regions (DRC, Guinea Conakry, Côte D'Ivoire and Uganda) where trypanosomiasis is  
358 endemic (TrypanoGEN consortium, European Nucleotide Archive study  
359 EGAS00001002482). Loci with minor allele frequency < 5% in the reference data were  
360 excluded and an  $r^2$  of 0.5 was used to select SNP in linkage disequilibrium.

361 DNA was genotyped by two commercial service providers: INRA- Site de Pierroton,  
362 Plateforme Genome Transcriptome de Bordeaux, France and ii- LGC genomics Hoddesden  
363 UK. At INRA multiplex design (two sets of 40 SNPs) was performed using Assay Design  
364 Suite v2.0 (Agena Biosciences). SNP genotyping was achieved with the iPLEX Gold

365 genotyping kit (Agena Biosciences) for the Mass Array iPLEX genotyping assay, following  
366 the manufacturer's instructions. Products were detected on a Mass Array mass  
367 spectrophotometer and data were acquired in real time with Mass Array RT software (Agena  
368 Biosciences). SNP clustering and validation was carried out with Typer 4.0 software (Agena  
369 Biosciences). At LGC Genomics SNP were genotyped using the PCR based KASP assay[48].

### 370 **Statistical analysis**

371 All statistical analyses were performed using the Plink 1.9 and R v 3.2.1 software. Individuals  
372 were excluded who had > 10% missing SNP data. SNP loci were excluded that > 10%  
373 missing genotypes or if the control samples were not in Hardy-Weinberg equilibrium  
374 ( $p < 0.001$ ). Case-control association analysis using SNP alleles/genotypes was undertaken  
375 using Fisher's exact test. The difference between the ethnic groups was estimated using the  
376  $F_{ST}$ , with values potentially varying from zero (no population differentiation) to one  
377 (complete differentiation) [47]. Ethnicity was not used as a risk factor for HAT because we  
378 observed no significant differences in  $F_{ST}$  between ethnic groups ( $F_{ST}$  maximum 0.015) or  
379 clustering by linguistic group by multidimensional scaling in Plink. Some studies have used  
380 ethnicity and age as risk factors for HAT but found no significant association [11,15]. 77 SNP  
381 remained in at least one comparison after filtering. P values were adjusted for multiple testing  
382 using the Bonferroni corrections and Benjamini Hocheberg false discovery rate test as  
383 implemented in Plink.

### 384 **Ethics Statement**

385 The population of the study was informed. All adult subjects provided written informed  
386 consent. For children, a parent or guardian of any child participant provided written informed  
387 consent on their behalf. The protocol of the study was approved by the traditional authorities  
388 (chief and village committee) and by National ethics committee hosted by the Public Health



389 Ministry of Côte d'Ivoire with the number: N°38/MSLS/CNERm-dkn 5th May 2014. This  
390 study is part of the TrypanoGen project which aims to a better understanding of genetic  
391 determinism of human susceptibility to HAT and the TrypanoGen-CI samples were archived  
392 in the TrypanoGen Biobank hosted by CIRDES in Bobo-Dioulasso, Burkina Faso [44].

393

394 **Acknowledgements:** We thank subjects who generously donated their specimens and the  
395 field workers from the Ivorian HAT foci for their dedication in collecting and processing  
396 these specimens.

397

398

## 399 **References**

400

- 401 1. Simarro PP, Diarra A, Ruiz Postigo JA, Franco JR, Jannin JG (2011) The human African  
402 trypanosomiasis control and surveillance programme of the World Health Organization 2000-  
403 2009: the way forward. PLoS Negl Trop Dis 5: e1007.
- 404 2. WHO (2013) Control and surveillance of human African trypanosomiasis. WHO Technical Report  
405 Series 984 Geneva.
- 406 3. Checchi F, Filipe JA, Barrett MP, Chandramohan D (2008) The natural progression of *Gambiense*  
407 sleeping sickness: what is the evidence? PLoS Negl Trop Dis 2: e303.
- 408 4. Garcia A, Jamonneau V, Magnus E, Laveissiere C, Lejon V, et al. (2000) Follow-up of Card  
409 Agglutination Trypanosomiasis Test (CATT) positive but apparently aparasitaemic individuals  
410 in Cote d'Ivoire: evidence for a complex and heterogeneous population. Trop Med Int Health  
411 5: 786-793.
- 412 5. Jamonneau V, Ilboudo H, Kabore J, Kaba D, Koffi M, et al. (2012) Untreated human infections by  
413 *Trypanosoma brucei gambiense* are not 100% fatal. PLoS Negl Trop Dis 6: e1691.
- 414 6. Kabore J, Macleod A, Jamonneau V, Ilboudo H, Duffy C, et al. (2011) Population genetic structure  
415 of Guinea *Trypanosoma brucei gambiense* isolates according to host factors. Infect Genet  
416 Evol 11: 1129-1135.
- 417 7. Koffi M, De Meeus T, Bucheton B, Solano P, Camara M, et al. (2009) Population genetics of  
418 *Trypanosoma brucei gambiense*, the agent of sleeping sickness in Western Africa. Proc Natl  
419 Acad Sci U S A 106: 209-214.
- 420 8. Ilboudo H, Bras-Goncalves R, Camara M, Flori L, Camara O, et al. (2014) Unravelling human  
421 trypanotolerance: IL8 is associated with infection control whereas IL10 and TNFalpha are  
422 associated with subsequent disease development. PLoS Pathog 10: e1004469.
- 423 9. Bucheton B, MacLeod A, Jamonneau V (2011) Human host determinants influencing the outcome  
424 of *Trypanosoma brucei gambiense* infections. Parasite Immunol 33: 438-447.
- 425 10. Jamonneau V, Ravel S, Garcia A, Koffi M, Truc P, et al. (2004) Characterization of *Trypanosoma*  
426 *brucei s.l.* infecting asymptomatic sleeping-sickness patients in Cote d'Ivoire: a new genetic  
427 group? Ann Trop Med Parasitol 98: 329-337.
- 428 11. Courtin D, Argiro L, Jamonneau V, N'Dri L, N'Guessan P, et al. (2006) Interest of tumor necrosis  
429 factor-alpha -308 G/A and interleukin-10 -592 C/A polymorphisms in human African  
430 trypanosomiasis. Infect Genet Evol 6: 123-129.
- 431 12. Courtin D, Milet J, Sabbagh A, Massaro JD, Castelli EC, et al. (2013) HLA-G 3' UTR-2 haplotype is  
432 associated with Human African trypanosomiasis susceptibility. Infect Genet Evol 17: 1-7.
- 433 13. Iraqi F, Clapcott SJ, Kumari P, Haley CS, Kemp SJ, et al. (2000) Fine mapping of trypanosomiasis  
434 resistance loci in murine advanced intercross lines. Mamm Genome 11: 645-648.
- 435 14. Kemp SJ, Iraqi F, Darvasi A, Soller M, Teale AJ (1997) Localization of genes controlling resistance  
436 to trypanosomiasis in mice. Nat Genet 16: 194-196.
- 437 15. Courtin D, Milet J, Jamonneau V, Yeminanga CS, Kumeso VK, et al. (2007) Association between  
438 human African trypanosomiasis and the IL6 gene in a Congolese population. Infect Genet  
439 Evol 7: 60-68.
- 440 16. Stijlemans B, Leng L, Brys L, Sparkes A, Vansintjan L, et al. (2014) MIF contributes to *Trypanosoma*  
441 *brucei* associated immunopathogenicity development. PLoS Pathog 10: e1004414.
- 442 17. Tiberti N, Hainard A, Lejon V, Robin X, Ngoyi DM, et al. (2010) Discovery and verification of  
443 osteopontin and Beta-2-microglobulin as promising markers for staging human African  
444 trypanosomiasis. Mol Cell Proteomics 9: 2783-2795.

- 445 18. Bakhiet M, Jansson L, Buscher P, Holmdahl R, Kristensson K, et al. (1996) Control of parasitemia  
446 and survival during *Trypanosoma brucei brucei* infection is related to strain-dependent ability  
447 to produce IL-4. *J Immunol* 157: 3518-3526.
- 448 19. MacLean L, Chisi JE, Odiit M, Gibson WC, Ferris V, et al. (2004) Severity of human african  
449 trypanosomiasis in East Africa is associated with geographic location, parasite genotype, and  
450 host inflammatory cytokine response profile. *Infect Immun* 72: 7040-7044.
- 451 20. Pays E, Vanhollenbeke B, Vanhamme L, Paturiaux-Hanocq F, Nolan DP, et al. (2006) The  
452 trypanolytic factor of human serum. *Nat Rev Microbiol* 4: 477-486.
- 453 21. Ilboudo H, Berthier D, Camara M, Camara O, Kabore J, et al. (2012) APOL1 expression is induced  
454 by *Trypanosoma brucei gambiense* infection but is not associated with differential  
455 susceptibility to sleeping sickness. *Infect Genet Evol* 12: 1519-1523.
- 456 22. Yamada Y, Metoki N, Yoshida H, Satoh K, Ichihara S, et al. (2006) Genetic risk for ischemic and  
457 hemorrhagic stroke. *Arterioscler Thromb Vasc Biol* 26: 1920-1925.
- 458 23. Raj DS (2009) Role of interleukin-6 in the anemia of chronic disease. *Semin Arthritis Rheum* 38:  
459 382-388.
- 460 24. Perera MK, Herath NP, Pathirana SL, Phone-Kyaw M, Alles HK, et al. (2013) Association of high  
461 plasma TNF-alpha levels and TNF-alpha/IL-10 ratios with TNF2 allele in severe *P. falciparum*  
462 malaria patients in Sri Lanka. *Pathog Glob Health* 107: 21-29.
- 463 25. Gichohi-Wainaina WN, Melse-Boonstra A, Swinkels DW, Zimmermann MB, Feskens EJ, et al.  
464 (2015) Common Variants and Haplotypes in the TF, TNF-alpha, and TMRSS6 Genes Are  
465 Associated with Iron Status in a Female Black South African Population. *J Nutr* 145: 945-953.
- 466 26. Knight JC, Udalova I, Hill AV, Greenwood BM, Peshu N, et al. (1999) A polymorphism that affects  
467 OCT-1 binding to the TNF promoter region is associated with severe malaria. *Nat Genet* 22:  
468 145-150.
- 469 27. Tu IP, Whittemore AS (1999) Power of association and linkage tests when the disease alleles are  
470 unobserved. *Am J Hum Genet* 64: 641-649.
- 471 28. Magez S, Caljon G (2011) Mouse models for pathogenic African trypanosomes: unravelling the  
472 immunology of host-parasite-vector interactions. *Parasite Immunol* 33: 423-429.
- 473 29. Daulouede S, Bouteille B, Moynet D, De Baetselier P, Courtois P, et al. (2001) Human macrophage  
474 tumor necrosis factor (TNF)-alpha production induced by *Trypanosoma brucei gambiense*  
475 and the role of TNF-alpha in parasite control. *J Infect Dis* 183: 988-991.
- 476 30. Magez S, Radwanska M, Beschin A, Sekikawa K, De Baetselier P (1999) Tumor necrosis factor  
477 alpha is a key mediator in the regulation of experimental *Trypanosoma brucei* infections.  
478 *Infect Immun* 67: 3128-3132.
- 479 31. Cooper A, Ilboudo H, Alibu VP, Ravel S, Enyaru J, et al. (2017) APOL1 renal risk variants have  
480 contrasting resistance and susceptibility associations with African trypanosomiasis. *Elife* 6.
- 481 32. Kabore WJ, Ilboudo H, Noyes H, Camara O, Kabore J, et al. (2017) Candidate gene study between  
482 human African trypanosomiasis clinical phenotypes in Guinea. *PLoS Negl Trop Dis* in press.
- 483 33. Genovese G, Friedman DJ, Ross MD, Lecordier L, Uzureau P, et al. (2010) Association of  
484 trypanolytic ApoL1 variants with kidney disease in African Americans. *Science* 329: 841-845.
- 485 34. Barton A, Lamb R, Symmons D, Silman A, Thomson W, et al. (2003) Macrophage migration  
486 inhibitory factor (MIF) gene polymorphism is associated with susceptibility to but not  
487 severity of inflammatory polyarthritis. *Genes Immun* 4: 487-491.
- 488 35. Rosado Jde D, Rodriguez-Sosa M (2011) Macrophage migration inhibitory factor (MIF): a key  
489 player in protozoan infections. *Int J Biol Sci* 7: 1239-1256.
- 490 36. Bernhagen J, Krohn R, Lue H, Gregory JL, Zerneck A, et al. (2007) MIF is a noncognate ligand of  
491 CXCR chemokine receptors in inflammatory and atherogenic cell recruitment. *Nat Med* 13:  
492 587-596.
- 493 37. Calandra T, Bernhagen J, Metz CN, Spiegel LA, Bacher M, et al. (1995) MIF as a glucocorticoid-  
494 induced modulator of cytokine production. *Nature* 377: 68-71.

- 495 38. Stijlemans B, Beschin A, Magez S, Van Ginderachter JA, De Baetselier P (2015) Iron Homeostasis  
496 and Trypanosoma brucei Associated Immunopathogenicity Development: A Battle/Quest for  
497 Iron. *Biomed Res Int* 2015: 819389.
- 498 39. Lajoie J, Hargrove J, Zijenah LS, Humphrey JH, Ward BJ, et al. (2006) Genetic variants in  
499 nonclassical major histocompatibility complex class I human leukocyte antigen (HLA)-E and  
500 HLA-G molecules are associated with susceptibility to heterosexual acquisition of HIV-1. *J*  
501 *Infect Dis* 193: 298-301.
- 502 40. Ferguson R, Ramanakumar AV, Richardson H, Tellier PP, Coutlee F, et al. (2011) Human leukocyte  
503 antigen (HLA)-E and HLA-G polymorphisms in human papillomavirus infection susceptibility  
504 and persistence. *Hum Immunol* 72: 337-341.
- 505 41. Lafon M, Prehaud C, Megret F, Lafage M, Mouillot G, et al. (2005) Modulation of HLA-G  
506 expression in human neural cells after neurotropic viral infections. *J Virol* 79: 15226-15237.
- 507 42. Zhao M, Zhang R, Xu X, Liu Y, Zhang H, et al. (2013) IL-10 reduces levels of apoptosis in  
508 *Toxoplasma gondii*-infected trophoblasts. *PLoS One* 8: e56455.
- 509 43. Jamonneau V, Bucheton B, Kabore J, Ilboudo H, Camara O, et al. (2010) Revisiting the immune  
510 trypanolysis test to optimise epidemiological surveillance and control of sleeping sickness in  
511 West Africa. *PLoS Negl Trop Dis* 4: e917.
- 512 44. Ilboudo H, Noyes H, Mulindwa J, Kimuda MP, Koffi M, et al. (2017) Introducing the TrypanoGEN  
513 biobank: A valuable resource for the elimination of human African trypanosomiasis. *PLoS*  
514 *Negl Trop Dis* 11: e0005438.
- 515 45. Zhao JH (2007) Gap: genetic analysis package. *J Stat Soft* 23: 1-18.
- 516 46. Gray IC, Campbell DA, Spurr NK (2000) Single nucleotide polymorphisms as tools in human  
517 genetics. *Hum Mol Genet* 9: 2403-2408.
- 518 47. Weir BS, Cockerham CC (1984) Estimating F-Statistics for the Analysis of Population Structure.  
519 *Evol* 38: 1358-1370.
- 520 48. Semagn k, Babu R, Hearn S, Olsen MS (2013) Single nucleotide polymorphism genotyping using  
521 Kompetitive Allele Specific PCR (KASP): Overview of the technology and its application in crop  
522 improvement. *Mol Breed* 33: 1-14.

523

Figure 1

Second Principle Component

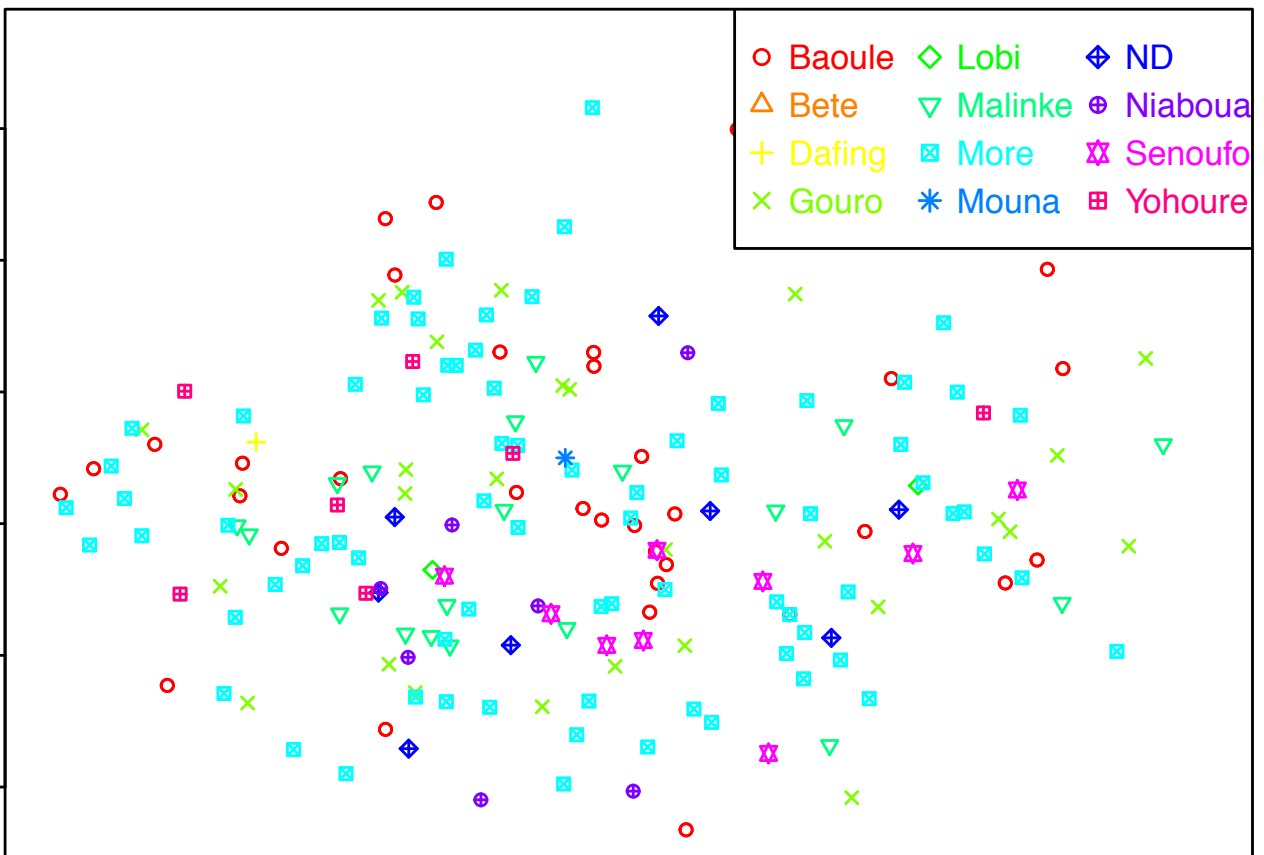

Second Principle Component

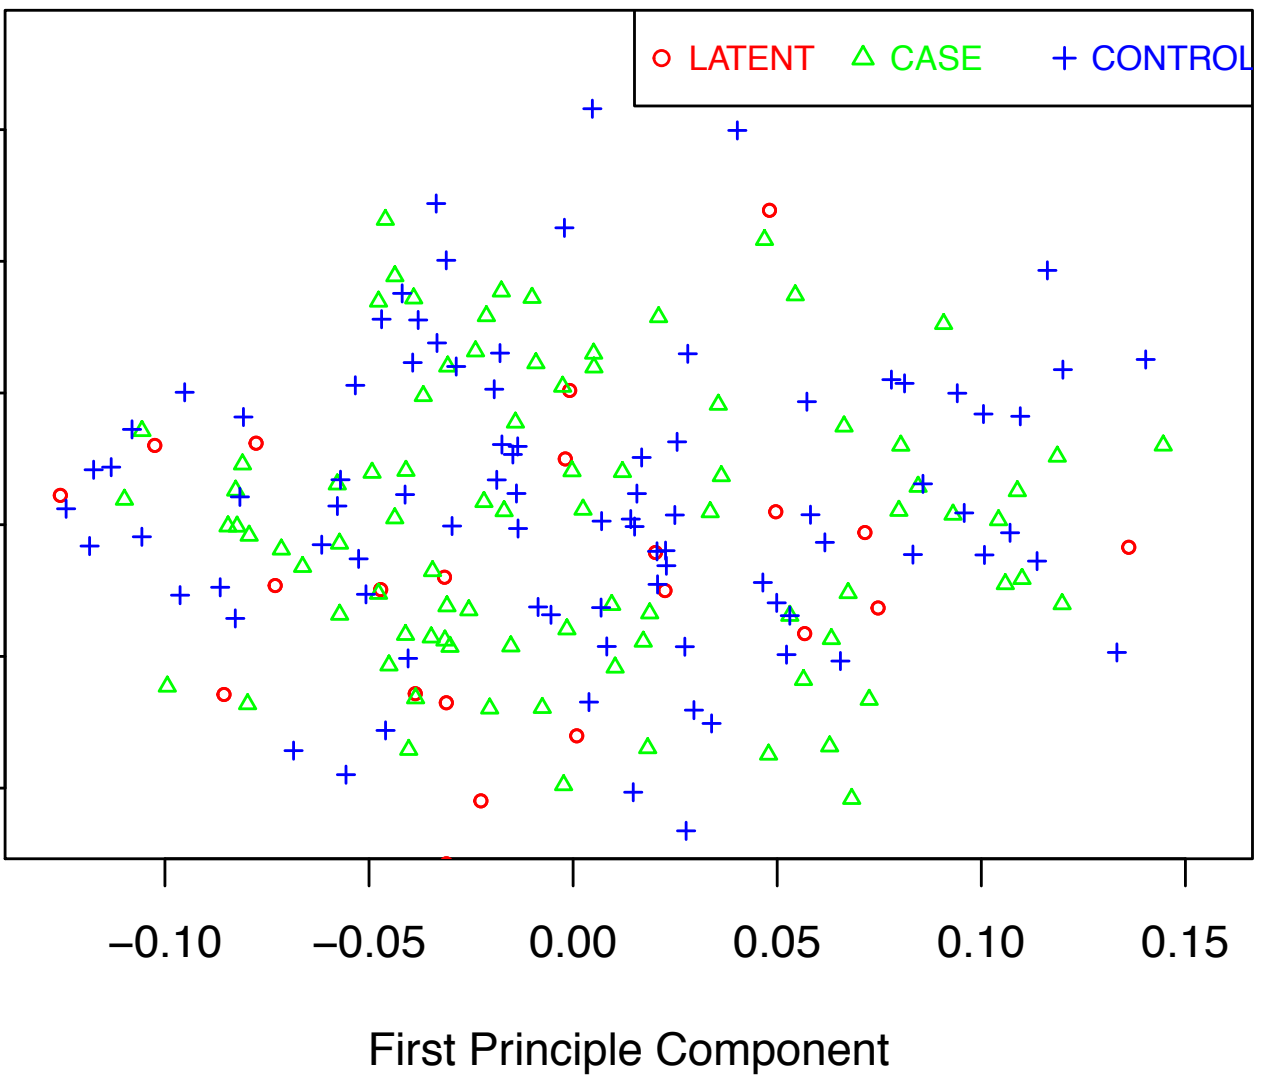

First Principle Component

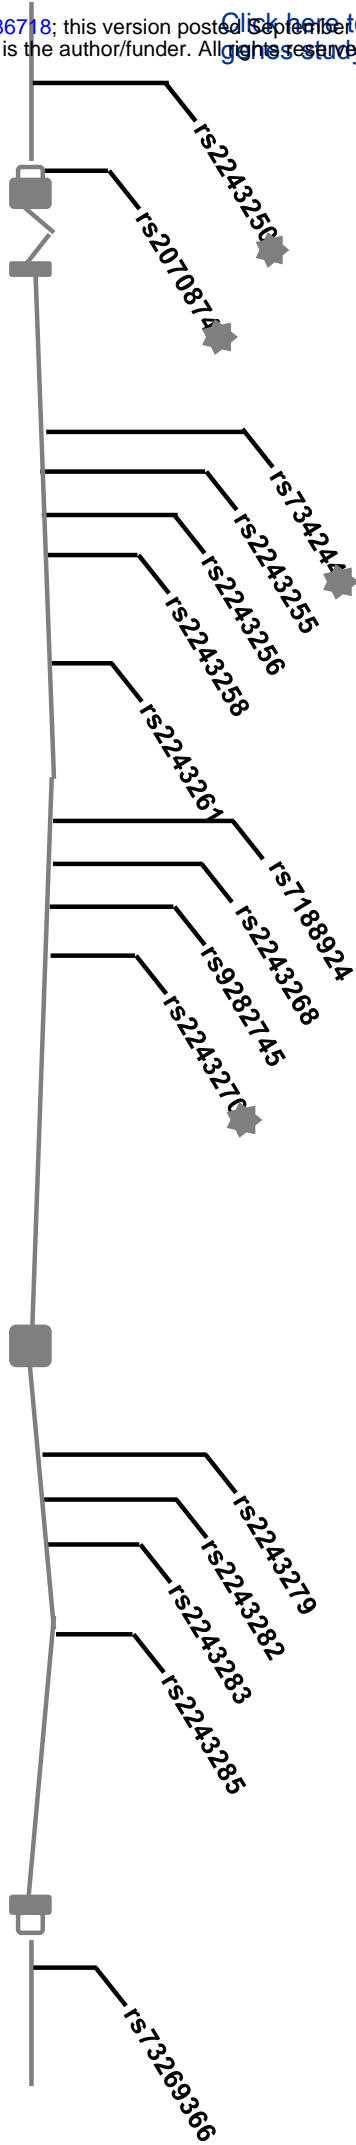

Source: https://www.biorxiv.org/content/10.1101/186718v1.full.pdf
